# Supplementary material for: Retrieval of the vertical profile of the cloud effective radius from theChinese FY-4 next-generation geostationary satellite
Source: Copernicus journal article supplement (doi:10.5194/acp-2019-706), 2019-08-12
Supplement: Supplementary file [file acp-2019-706-AC1-supplement.pdf]

# Response to the reviewers

We are grateful to the Editor and the two Reviewers for their precious times in reviewing our manuscript. The comments and suggestions of the Reviewers are very helpful and valuable. The issues raised by the reviewers have been addressed (in blue color) in the revised manuscript. Kindly find a point-by-point reply to the issues as follows (presented in blue color).

## Reviewer #1:

Major points:

1. I strongly suggest that the manuscript present a figure to show how the bi-spectral reflectance vary with cloud optical depth and effective radius. The bi-spectral reflectance algorithm has been widely used (for example, in the cloud retrieval of MODIS). It would be very helpful for the readers to see how sensitive the bi-spectral reflectance is to the cloud optical depth and effective radius for the FY-4 bands. Especially this study shows that the effective radius retrieved from FY-4 is generally smaller than that retrieved from MODIS. I'm curious if this could be caused by some errors in the measurement of the near-infrared reflectance. Of course, the discrepancy between the FY-4 and MODIS retrievals may be caused by other reasons, such as different resolution, different view angles, etc.. I can understand there is discrepancy between instruments. But a figure showing the bi-spectral reflectance as a function of optical depth and effective radius for the FY-4 would be very helpful. The readers could even compare this figure with MODIS.

**Response:** Thanks for your suggestion! We have added a figure to show the look-up table at the specific solar zenith angle, viewing zenith angle and relative azimuth. [Line 126-141; Figure 3; Table 1]

In fact, we have also done a comparison with the MODIS look-up table, but due to copyright, this should not appear in the manuscript. The look-up tables are similar overall, and the subtle differences may be due to differences in the center wavelength (FY-4 1.61 $\mu\text{m}$  vs MODIS 1.65 $\mu\text{m}$ ) and spectral response functions.

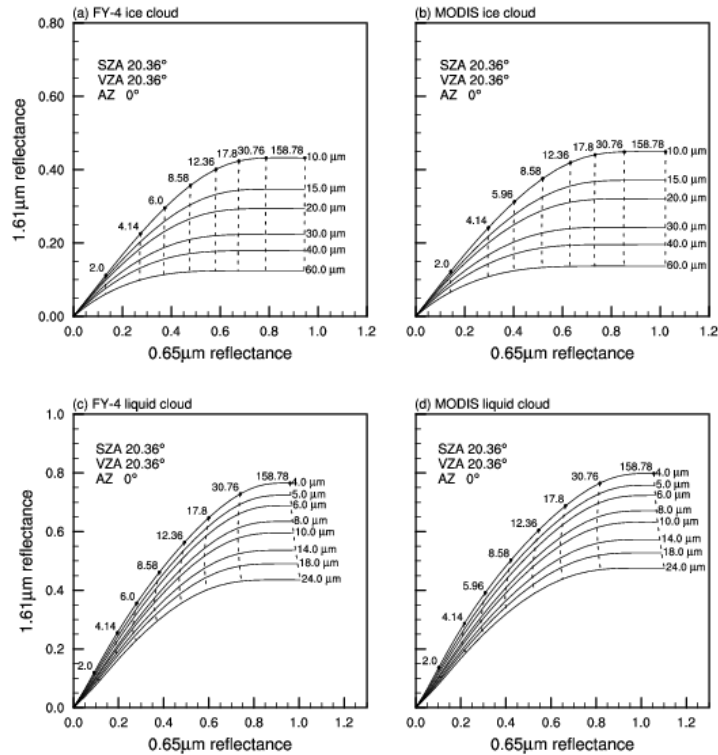

Figure S1. Bi-spectral solar reflectance lookup table for FY-4 and MODIS. Here, solar zenith angle=20.36°, viewing zenith angle=20.36°, and relative azimuth=0°, with a 0 surface albedo.

2. In Figure 8, I guess it's the median radius that is shown in the figure? I suggest other percentiles, such as the 25 and 75 percentiles, should also be shown in the figure. It seems that the manuscript focuses on some subtle details in Figure 8. For example, it is said in the manuscript that 15-22 microns (03:30-05:30 UTC), correspond to a significantly accelerated growth. But this profile is only the median effective radius. I would like to see if this accelerated growth is still seen in the 25 and 75 percentiles. Similarly, 25 and 75 percentiles should also be plotted in Figure 3.

**Response:** Yes, it is the median radius. We have added relevant descriptions in the figure caption. Many thanks for your crucial suggestions. The 25 and 75 percentiles have been added in Figure 6 and Figure 8. The two percentiles do provide some valuable information to explain the cloud particle growth. For example, turning points of the 25 and 75 percentiles are at different temperatures. We have added some descriptions. [Figure 8; Figure 10; Line 292-293]

3. The discussions related to the microphysical processes on page 8 are not very clear. I don't understand why the cloud in an earlier stage (00:30 UTC) is totally glaciated. The manuscript should at least provide

some description of the convection at this stage. For temperature lower than 273 K, the cloud starts to become mixed phase, so ice-related processes could be very important. But the manuscript seems to emphasize on the collision-coalescence process to explain the accelerated growth for the 15-22 microns (03:30-05:30 UTC). In addition, in lines 250-251, “the rate of increase in  $r_e$  slows down”. Why? I would expect that, in the mixed-phase, the cloud particles are easier to get larger. Line 239-240, “did not exhibit the characteristics of the earlier zones”, what does this mean?

**Response:** Sorry for our unclear description. There are three distinct convective cells at 00:30 UTC. According to the maximum temperature gradient method described in the manuscript, the cloud is divided into three cloud clusters. The cloud cluster we are concerned with is small in size and does not contain enough pixels with high temperature (<30 samples in 2.5-K temperature interval). Therefore, we can only see the glaciated part in the profile. [Line 278-280]

As pointed out by Reviewer #2, we have completely updated the retrieval algorithm. Based on new results, we have revised the description of Figure 10. Since we are focusing on a convective cloud cluster, some water-phase processes (such as coalescence) also occur above the 0 degree layer. Although cloud particles are easier to get larger in the mixed-phase (increased proportion of ice particles), the increase rate may be slightly lower than the increase rate of coalescence in this case. As reported by Rosenfeld et al. (2014), there are many types of T- $r_e$  relations over different regions and different aerosol conditions.

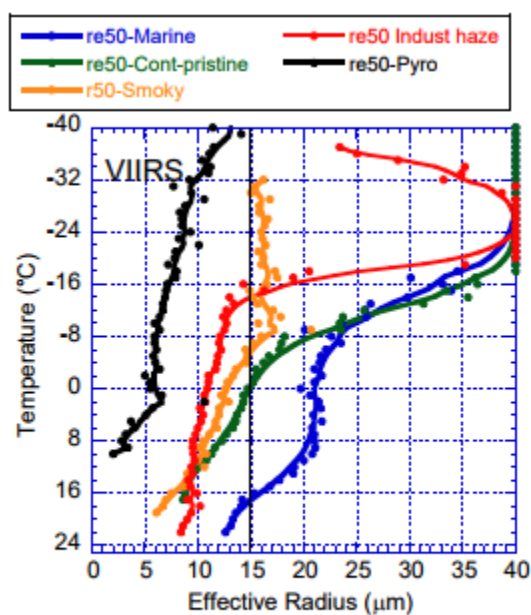

Fig. 25. The  $T-r_e$  relations of all the types of deep convective cloud in this study.

Rosenfeld, D., et al: High resolution (375 m) cloud microstructure as seen from the NPP/VIIRS Satellite imager, Atmos. Chem. Phys., 14, 2479–2496, doi:10.5194/acp-14-2479-2014, 2014.

Minor points:

(1) In the abstract, lines 13-15: I think these two sentences should be reorganized. Identifying cloud cluster is one task of this study. Obtaining the  $R_e$  profiles is the other task of this study. The two sentences in the manuscript seem to mix the two tasks together.

**Response:** Thanks! We have split the content into two sentences to make it clear. [Line 14-15]

(2) In the introduction: because the  $R_e$  profile is very useful for studying precipitation formation, the first paragraph of the introduction should have some writings on precipitation. In the first sentence, only the radiation budget is mentioned. I think it should also be pointed out that clouds control precipitation, and therefore the water cycle.

**Response:** Thanks! We have added a reference and some description. [Line 26-27]

(3) Line 31: the coalescence of cloud droplets is proportional to  $R_e^5$ . What does this mean? What property of coalescence is proportional to  $R_e^5$ ?

**Response:** Sorry for the confusing sentence. We have changed it to “that the rate of droplet coalescence is proportional to the 5th power of the mean volume radius” [Line 32-33]

(4) Line 76: the aim of this study was to automatically identify and... Therefore I think section 2.2 should be reorganized. The method of identifying the cloud cluster should first be presented, and then the method for obtaining profiles of effective radius is presented. But I'll leave it to the authors to decide on this.

**Response:** Thanks! We have carefully considered this suggestion. Actually, our technical route is,  $R_e$  retrieval → cloud-cluster identification →  $R_e$  profiles. We do not mention  $R_e$  retrieval at the aim of study, because the bi-spectral reflectance algorithm has been widely used. Therefore, in the method section, we still maintain the current structure.

In order to make the logic clear, we added subtitles in section 2.2.

(5) In section 2.1: it's better to show the total 14 band wavelength. How many bands are in the visible? How many in the near-infrared? And how many in the infrared

**Response:** Thanks, we agree. We have added a sentence to show the total 14 bands. [Line 93-95]

(6) Figure 2: Figure 2 should only plots the north hemisphere. There's no need to plot the southern hemisphere in the figure. The domain shown in Figure 3 should also be indicated in Figure 2. The angles are shown in Figure 2. But I don't see any discussion of the angles in the text.

**Response:** Many thanks for your suggestion. We have revised Figure 2 according to your suggestion. The angles affect the reflectance and are considered in the lookup table. We have added some brief explanation. [Line 126-127; Figure 2]

(7) Line 150-152: why is the most extreme precipitation event selected for this study? Please provide some motivation. Intuitively I would expect that this study could start with a normal precipitation case.

**Response:** Thanks. The assumption of the  $R_e$ -profile retrieval is that  $R_e$  and temperature of the cloud top are the same as the  $R_e$  and temperature within the cloud at the same height. In order to obtain a complete  $R_e$  profile, the distribution of cloud-top temperature should be as wide as possible. Compared to normal stratiform precipitation, the presence of convective precipitation is beneficial for the calculation of the  $R_e$  profile. Another reason is that, the Meiyu period was short, the precipitation was weak, and the rain belt was unstable in 2018 (atypical Meiyu year). During the Integrative Monsoon Frontal Rainfall Experiment (June 10<sup>th</sup> to July 10<sup>th</sup>), there were only three precipitation processes. This precipitation case happened to pass through the Xianning Station (114.28E, 29.87N) and the observation data was the most complete. The related results will be published in a JGR special issue (Integrative Monsoon Frontal Rainfall Experiment).

We have added some motivation, and changed the word “extreme” to “heavy”. [Line 189-192]

## Reviewer #2:

Major comments:

### 1. Description of methods

A paper in AMT/ACP should enable the reader to understand and to replicate the presented results and should not limit itself to report on its scientific advancements. The two methods central to this manuscript, however, are not adequately described to guarantee the reproducibility of the presented results. While the description of a bi-spectral retrieval algorithm should be well established and straightforward, the method to find independent cloud clusters seems new and worth to be described in more detail. In the following,

I will try to give more specific advices what is still missing in section “2.2. Methods” and how to organize it in subsections:

**Response:** Many thanks for your important suggestion. We have reorganized the whole section “Methods”.

First, I strongly suggest to explain the forward simulations with libRadtran in more detail. The authors should clearly state all cloud parameters and their boundaries which have been varied during the forward simulations. To understand the discrepancies between retrieved reff from FY-4 and MODIS, the reader needs to know the range and steps of optical thickness, effective radius, illumination and viewing angles. The current manuscript does not explain how the model clouds were set up, if an standard aerosol environment was considered and if a variable ground albedo was taken into account? The given citation for the used optical properties parameterization for ice clouds (Baum et al., 2014) also does not explain if the baum v36 (Heymsfield et al., 2013; Yang et al., 1993; Baum et al., 2014) parameterization with the general habit mixture, the rough-aggregates or the solid-columns option has been used? Moreover, the authors state that they used the optical properties parameterization for liquid clouds of Hu et al. (1993), but should be aware that the developers of libRadtran state that:

Note that this parameterization has been developed to calculate irradiances, hence it is less suitable for radiances. This is due to the use of the Henyey-Greenstein phase function as an approximation of the real Mie phase function.

**Response:** Thank you very much for your important suggestions.

1. We have added a table to show the grid point values of the lookup table, including  $\tau$ ,  $R_e$ , and angles.

**[Table 1]**

2. An example of  $\tau$  and  $R_e$  lookup table over ocean\_water underlying surface at specific angles has been added. The comparison with MODIS lookup table could be seen in Figure S1. **[Figure 3]**

3. In order to simplify the model and speed up the calculation, we closed the aerosol module, and only set the two types of underlying surfaces, mixed\_forest and ocean\_water. **[Line 121-124]**

4. We have completely recalculated the lookup table. Here, we adopt rough-aggregate option for ice cloud, and Mie scheme for water clouds. **[Line 118-120]**

As a result, the others figures have changed slightly.

Second, the authors do not describe how they handle the phase discrimination between water and ice clouds at all. The example discussed in section 4 clearly contains water as well as ice clouds. Inferring from the retrieved  $\text{reff}$ , the retrieval seems to handle water and ice clouds quite well. There is, however, no explanation if a threshold technique is used to separate ice from water clouds and how the mixed-phase region is handled. This is especially important since the discussion in section 4 is focused on the region of cloud glaciation.

**Response:** Many thanks for your crucial suggestion. There are many possibilities in thermal infrared pixels with 4 km resolution, so we refer to the MODIS algorithms, both using the threshold method and interpolation method.

Briefly, 273 K and 233 K are used as thresholds for pure water clouds and pure ice clouds. When the bright temperature is between 233 K and 273 K, we bring the reflectance into the water-cloud and ice-cloud lookup table simultaneously. If only one  $R_e$  is successfully retrieved, use this value, otherwise perform linear interpolation based on the differences between bright temperature and 233 K (273 K).

[Line 129-141]

At last, section 2.2 “Methods” also introduces the technique to identify cloud clusters which is a central aspect of this study. While this technique should get its own subsection, it also deserves a more visual and complete description: The authors miss to provide important details, like the size of the Gaussian filter and the used value of the distance threshold. Furthermore, the authors write that “the local temperature minimum” (P5, L135) is determined, but to the reader it is not clear if this is done pixel-wise or for the complete scene. Do you identify all local temperature minima in the scene or only for a search radius around each pixel?

Moreover, the authors write on P5, L139ff:

“3) Combining the processed 10.8 micron brightness temperature and the local minimum using the maximum temperature gradient method, a sequential search is carried out to determine the convective core to which each pixel belongs, thereby dividing the cloud clusters.”

Here, it is not clear how the maximum temperature gradient method (which is never explained!) can be combined with a brightness temperature to determine the convective core for each pixel in a sequential search (which is also not explained). Here, a descriptive figure could significantly improve the comprehensibility of this paragraph. In my opinion, the revision of this section should be of major

concern since it seems to be the main novelty of this work.

**Response:** Sorry for our unclear description.

1. We have added subtitles for  $R_e$  retrieval and Cloud-cluster identification. Some important details have been provided. [Line 143; Line 160-161]

2. We have added some details for local temperature minimum. We firstly identify all local temperature minima in the entire scene, and then merge the minimums within the distance threshold (40 km). [Line 168-170]

3. We have added a schematic diagram for the maximum temperature gradient method. We have also provided the specific calculation methods. [Line 173-178; Figure 4]

## 2. Discussion of results

As also pointed out by RC1, the discussion about the microphysical evolution of the cloud cluster on page 8 is not very convincing. In my opinion, the authors focus on details in Figure 8 and on processes (collision-coalescence, precipitation formation), which their spaceborne technique probably never can resolve in detail. As long as the handling or the influence of mixed-phase cloud regions is not explained, their discussion oversells their approach while it misses to highlight its strength: to observe the timescales between initiation, invigoration and the mature phase of a convective cluster.

**Response:** Many thanks for your constructive suggestions. We agree that our current technique may not be able to reveal some subtle details of the precipitation process perfectly due to the coarse resolution of the instrument and the uncertainty in precipitation itself. We have removed some over-explained texts (or speculation). Thank you for recognizing our technique of objective cloud cluster identification. We have added some description of cloud-cluster morphology.

Examples of unclear or unproven sentences are:

Page 8, L239f: “Re changed almost linearly with temperature between 285 and 230 K and did not exhibit the characteristics of the earlier zones” What do you mean here by “earlier zones”?

**Response:** We have revised it to “did not exhibit a clear boundary between the diffusional growth zone, the coalescence growth zone, the rainout zone and the mixed phase zone”. [Line 284-285]

Page 8, L241f: “Under the influence of such strong ascending motion, the boundary between the zones



is broken and there is not enough time for the growth of precipitation.”

This statement is incomprehensible to me since I can not observe clear boundaries in Figure 8.

**Response:** Sorry for our unclear description. When the system is mature, the boundaries of the zone would be clear because of the differences in different physical processes, such as Figure 10e and Figure 10f. In the early stage (such as Figure 10b), the boundary is broken, and  $R_e$  changed almost linearly because of the strong ascending motion. **[Line 286]**

Page 8, L255f: “In addition, because of the deposition of aerosols after precipitation, sufficient water vapor allowed  $R_e$  to exceed 20m at higher temperatures.” Can you deduce this observation from your retrieval results alone? I doubt that you can observe the deposition of aerosols from a geostationary satellite. As the cluster during this phase is mainly governed by a thinning anvil, multilayer cloud effects have to be taken into account for the discussion of the observed reff profile.

**Response:** It is our speculation instead of observation. Based on current data, we cannot retrieve aerosols under clouds. This sentence has been deleted.

We totally agree with you that multilayer cloud and anvil dominate, which affects the retrieval of  $R_e$  profile. Thanks again for your reasonable explanation! We have added some discussion. **[Line 299-202]**

Minor comments

Title: I suggest a slight change to the title of the manuscript, since the original title “Retrieval of the vertical profile ... ” gives the impression of a retrieval which can be applied to a single cloud like multi-wavelength retrievals (e.g. Chang et al. (2003)). In my opinion, the title “Retrieval of the vertical evolution of the cloud effective radius from the Chinese FY-4 next-generation geostationary satellite” better captures the approach to retrieve the vertical profile of reff by observing the evolution of reff using a cloud ensemble approach.

**Response:** We appreciate your nice suggestion. The title has been revised.

References: Please check all references for chronological order

**Response:** We have checked all references, and they are arranged in chronological order now.

P1, L31: Freud and Rosenfeld (2003) showed that the rate of droplet coalescence is proportional to the

mean volume radius  $R_v^5$  and not the mean effective radius  $R_{eff}^5$ .

**Response:** Thanks. We have changed it to “that the rate of droplet coalescence is proportional to the 5th power of the mean volume radius” [Line 33-34]

P2, L38f: Rephrase your sentence “More aerosols result in more cloud condensation nuclei (CCN), leading to a higher height of the 14 $\mu$ m threshold for  $R_e$  and a smaller coalescence efficiency” into “More aerosols result in more cloud condensation nuclei (CCN) and smaller  $r_{eff}$  with coalescence occurring at a higher altitude during ascent”

**Response:** Thanks. We have changed this sentence according to your nice suggestion. [Line 40-41]

P2, L49f: Besides the multi-wavelength approach you should also mention the cloud side perspective approach to directly retrieve the vertical profile of  $r_{eff}$  (e.g. Ewald et al. (2019)).

**Response:** Many thanks for your nice suggestion and the important reference. We have mentioned this approach in the revised manuscript. [Line 56-58]

P3, L74f: “To the best of our knowledge, no instrument has yet provided an official  $R_e$  vertical profile product.” This statement is not true. You should at least mention multi-instrument products like DARDAR, 2C-ICE or Cloudnet which provide effective radius profiles on an operational basis:

Delanoe, J., and R. J. Hogan, 2010: Combined CloudSat-CALIPSO-MODIS retrievals of the properties of ice clouds. J. Geophys. Res., 115, D00H29.

Deng M, Gerald G. Mace, Zhien Wang, and R. Paul Lawson, 2013: Evaluation of Several A-Train Ice Cloud Retrieval Products with In Situ Measurements Collected during the SPARTICUS Campaign. J. Appl. Meteor. Climatol., 52, 1014–1030.

**Response:** Sorry for our misleading statement. We have revised the description. [Line 78-80]

Moreover, it is not clear what you mean with “official”. Maybe you mean “operational” in this context?

**Response:** Yes. Changed. [Line 80]

- P4, L95 “We selected Chinese regional data”. Please be more precise what data and from which source (model, measurements?).

**Response:** Sorry for our unclear description. FY-4 AGRI has two scanning methods: full-disk scan and

Chinese regional scan. At 4 km resolution, full-disk scan has 2748\*2748 pixels, and Chinese regional scan has 1108\*2748 pixels. Here, we selected FY-4 AGRI Chinese regional scan data. We have added some descriptions. [Line 96; Line 101]

P4, L98 Please refer to different sub-panels (a, b, c) in Figure 2. Moreover I do not understand what you mean with “closely related to the retrieval”.

**Response:** We have reorganized this sentence and added specific names of channels. [Line 103-105]

P4, L100 “The spectral retrieval algorithm of cloud properties is based on the characteristics of the cloud itself and the bi-spectral reflectance algorithm is the most representative.”

This sentence is incomprehensible. What do you mean by that?

**Response:** Sorry for this unclear sentence. We have revised it to “the spectral retrieval algorithms, in which the bi-spectral reflectance algorithm is the most representative, are based on the optical characteristics of the cloud itself.” [Line 108-109]

P5, L130 Please elaborate what you mean by “The original data are preprocessed”.

**Response:** Sorry for this unclear description. “Preprocess” and “passed through a Gaussian filter” mean the same. We have revised it to “the 10.8  $\mu\text{m}$  channel brightness temperature is pre-processed through a Gaussian filter”. [Line 160]

P5, L154ff You only mention MODIS in your manuscript and never mention the satellite and the actual retrieval product you used in your comparison. You obviously used data from MODIS on Terra. Moreover, there are multiple scientific datasets (SDS) for cloud effective radius retrieved with different techniques and filters. Did you use the SDS Cloud\_Effective\_Radius\_16 with the same channel combination?

**Response:** Many thanks for your crucial suggestions. We used the variable Cloud\_Effective\_Radius in the first draft. We have already recalculated the figures and used Cloud\_Effective\_Radius\_16 (Cloud\_Optical\_Thickness\_16). [Line 193; Line 200; Line 493]

P6, L174 Weather radars (here with a coarser resolution than the satellite!) should not be used to explain resolution effects between different satellites working in the visible wavelength region. Drizzle or a few

rain drops in a pixel can give you a radar signal which seems to be clear in the visible wavelength region.

**Response:** Sorry for our unclear description. Here, precipitation radar (PR) and visible and infrared scanner (VIRS) are both onboard the same satellite (TRMM, Tropical Rainfall Measuring Mission satellite). Many studies merge the two to analyze “warm rain” or the others. We agree that many possibilities exist in the pixel (especially different resolution pixel). [Line 214-215]

P9, L274 “The glaciation temperature increased significantly during the period of dissipation” Have you shown this observation in the results? And with which method?

**Response:** Sorry for this misleading sentence. We have deleted it in the revised manuscript.

Wording

P1, L2 “from the first of the Chinese” ... “from the first Chinese”

**Response:** Thanks. Changed. [Line 13]

P1, L28 “determining the effects of radiation and the water cycle on the Earth’s climate system” ... “determining their impact on the water cycle and their radiative effects on Earth’s climate system”

**Response:** Thanks. Changed. [Line 31]

P2, L55 “obtain” ... “correlate”

**Response:** Thanks. Changed. [Line 59]

P3, L93 “the shortwave distribution of AGRI” ... “the shortwave spectral characteristics of AGRI bands”

**Response:** Thanks. Changed. [Line 99]

P4, L97 Please rephrase “... and the three angles important for retrieval”

**Response:** Thanks. This sentence has been reorganized. [Line 104]

P9, L259 “We used bi-spectral reflectance observations from the FY-4 AGRI to calculate a lookup table to retrieve  $R_e$  and  $\tau$ .” This sentence does not make sense.

**Response:** Thanks. This sentence has been reorganized. [Line 305]

# Retrieval of the vertical **evolution** of the cloud effective radius from the Chinese FY-4 next-generation geostationary satellite

Yilun Chen<sup>1, 2, 5</sup>, Guangcan Chen<sup>1</sup>, Chunguang Cui<sup>3</sup>, Aoqi Zhang<sup>1, 2, 5</sup>, Rong Wan<sup>3</sup>, Shengnan Zhou<sup>1, 4</sup>, Dongyong Wang<sup>4</sup>, Yunfei Fu<sup>1</sup>

5 <sup>1</sup>School of Earth and Space Sciences, University of Science and Technology of China, Hefei, 230026, China.

<sup>2</sup>School of Atmospheric Sciences, Sun Yat-Sen University, Zhuhai, 519082, China

<sup>3</sup>Hubei Key Laboratory for Heavy Rain Monitoring and Warning Research, Institute of Heavy Rain, China Meteorological Administration, Wuhan, 430205, China.

<sup>4</sup>Anhui Meteorological Observatory, Hefei, 230001, China.

10 <sup>5</sup>Southern Marine Science and Engineering Guangdong Laboratory (Zhuhai), Zhuhai, 519082, China

*Correspondence to:* Yunfei Fu (fyf@ustc.edu.cn)

**Abstract.** The vertical **evolution** of the cloud effective radius ( $R_e$ ) reflects the precipitation-forming process. Based on observations from **the first Chinese** next-generation geostationary meteorological satellites (FY-4A), we established a new method for objectively obtaining the vertical temperature vs  $R_e$  profile. **First of all**,  $R_e$  was calculated using a bi-spectrum  
15 lookup table. **And then**, cloud clusters were objectively identified using the maximum temperature gradient method. **Finally**, the  $R_e$  profile in a certain cloud was then obtained by combining these two sets of data. Compared with the conventional method used to obtain the  $R_e$  profile from the subjective division of a region, objective cloud cluster identification establishes a unified standard, increases the credibility of the  $R_e$  profile and facilitates the comparison of different  $R_e$  profiles. To  
20 investigate its performance, we selected a heavy precipitation event from the Integrative Monsoon Frontal Rainfall Experiment in summer 2018. The results showed that the method successfully identified and tracked the cloud cluster. The  $R_e$  profile showed completely different morphologies in different life stages of the cloud cluster, which is important in the characterization of the formation of precipitation and the temporal evolution of microphysical processes.

## 1 Introduction

More than half of the Earth's surface is covered by clouds. As an important part of the Earth–atmosphere system, clouds affect  
25 the radiation budget through reflection, transmission, absorption and emission and therefore affect both the weather and climate (Liou, 1986; Rossow and Schiffer, 1999). **Clouds also affect the water cycle through controlling precipitation, which is the main way that the water in the atmosphere returns to the surface** (Oki and Kanae, 2006). Different clouds have different cloud-top heights, morphology, particle size and optical thickness (Rangno and Hobbs, 2005). Changes in the droplet size in clouds affect climate sensitivity (Wetherald and Manabe, 1988) and can also characterize the indirect effects of aerosols (Rosenfeld  
30 et al., 2007; Rosenfeld et al., 2012). An understanding of the microphysical characteristics of clouds is a prerequisite of **determining their impact on the water cycle and their radiative effects on Earth's climate system.**

The cloud effective radius ( $R_e$ ) is the core parameter representing the microphysical characteristics of clouds and is closely related to the processes forming precipitation. Freud and Rosenfeld (2012) showed that [the rate of droplet coalescence is proportional to the 5th power of the mean volume radius](#), which means that the change in the droplet coalescence rate is small when  $R_e$  is small and warm rain is efficiently formed when  $R_e$  is  $>14 \mu\text{m}$ . Similarly, for marine stratocumulus clouds, when  $R_e$  is  $<14 \mu\text{m}$ , the column maximum rain intensity is almost  $<0.1 \text{ mm h}^{-1}$ , but the intensity of rain increases rapidly as  $R_e$  exceeds this threshold, regardless of the cloud water path (Rosenfeld et al., 2012). To date, a large number of studies have illustrated this crucial threshold using simulations, satellite remote sensing and aircraft observations (Rosenfeld and Gutman, 1994; Suzuki et al., 2010; Suzuki et al., 2011; [Braga et al., 2017](#)). The existence of this crucial threshold can also be used to explain the suppressing effect of anthropogenic aerosols on precipitation. [More aerosols result in more cloud condensation nuclei \(CCN\) and smaller  \$R\_e\$  with coalescence occurring at a higher altitude during ascent](#) (Rosenfeld, 1999; Rosenfeld, 2000).

The vertical evolution of  $R_e$  is a fundamental property describing the development of the whole cloud cluster (Rosenfeld, 2018). There have been many studies of the vertical profiles of microphysical properties based on observations from aircraft (Andreae et al., 2004; [Rosenfeld et al., 2006](#); Prabha et al., 2011). Pawlowska et al. (2000) showed that  $R_e$  varies regularly with altitude. Painemal and Zuidema (2011) normalized the vertical profiles of microphysical properties by the cloud-top height and the in-cloud maximum value and obtained adiabatic-like profiles with the maximum value of  $R_e$  near the cloud top. Wendisch et al. (2016) found that  $R_e$  increases rapidly with height in clean clouds, but increases slowly in polluted regions. Although aircraft observations can intuitively obtain the vertical structure of microphysical parameters in clouds, they are limited by the platform itself and it is difficult to make continuous, wide observations. Satellite remote sensing has a global perspective that captures multiple clouds in an area at the same time.

It is difficult to directly retrieve the vertical profile of  $R_e$  using satellite visible and infrared bands. By establishing the weighting functions of near-infrared atmospheric window bands, Platnick (2000) attempted to develop retrieval algorithms for  $R_e$  profiles in specific clouds. Chang and Li (2002; 2003) further developed this method using multispectral near-infrared bands from Moderate-Resolution Imaging Spectroradiometer (MODIS) observations. However, their algorithm is highly sensitive to small changes in reflectance and the requirements for cloud uniformity, instrument error and model error are very high. As such, the algorithm cannot be widely applied to existing satellite observations (King and Vaughan, 2012). [Recently, Ewald et al. \(2019\) developed an algorithm using reflected solar radiation from cloud sides, which may provide a new perspective on the vertical evolution of  \$R\_e\$ .](#)

Pioneering work by Rosenfeld and Lensky (1998) introduced a technique to [correlate](#) the change in  $R_e$  with cloud-top temperature. This technique was subsequently applied to a wide range of instruments onboard polar-orbiting satellites and revealed the effects of anthropogenic aerosols on precipitation, the effects of aerosols on glaciation temperatures, the vertical profiles of microphysical properties in strongly convective clouds and the retrieval of CCN concentrations (Rosenfeld, 2000; Rosenfeld et al., 2005; [Ansmann et al., 2008](#); Rosenfeld et al., 2008; Rosenfeld et al., 2011; [Zheng and Rosenfeld, 2015](#); Rosenfeld, 2018). The core of this technique was to assume that the  $R_e$  and temperature of the cloud top (the cloud surface observed by the satellite) were the same as the  $R_e$  and temperature within the cloud at the same height and that the relationship

between  $R_e$  and temperature in a given region at a given time was similar to the  $R_e$ -temperature time evolution of a given cloud at one location. Lensky and Rosenfeld (2006) applied this technique to observations from geostationary satellites and obtained the development and evolution of temperature and  $R_e$  for several convective cells.

70 These studies effectively revealed the  $R_e$  profiles of different clouds, but there are still some areas that require improvement, the most important of which is the selection of the study area. Previous work typically used a subjective polygon to select the study area and then calculated the  $R_e$ -temperature relationship in that area. For example, Rosenfeld and Lensky (1998) specified that a study should “define a window containing a convective cloud cluster with elements representing all growing stages, typically containing several thousand[s] pixels”. This method is suitable for experienced scientists, but not conducive to the repeated work of other researchers. In the face of large systems (such as mesoscale convective systems), it is difficult  
75 for researchers to explain why polygons are used to frame such specific regions (the shape of the polygons and the actual clouds are clearly different). It is therefore necessary to develop an objective cloud cluster identification method and to calculate the  $R_e$  vertical profile of the cloud cluster. This can solve these problems, increase the credibility of the  $R_e$  profile and facilitate the comparison of  $R_e$  vertical profiles in different regions. Although some active instruments (e.g. Cloud Profiling Radar) can already retrieve  $R_e$  profiles effectively (Delanoe and Hogan, 2010; Deng et al., 2013), to the best of our knowledge,  
80 no passive instrument onboard geostationary satellite has yet provided an operational  $R_e$  vertical profile product.

The aim of this study was to automatically identify and track the development and evolution of cloud clusters based on objective cloud cluster identification and to obtain the  $R_e$  vertical profiles of these objectively identified clusters. Incorporating this technique into observations from geostationary satellites will give  $R_e$  vertical profiles of a specific convective system at different life stages, helping to explain the mechanism for the formation of precipitation and changes in the upper glaciation  
85 temperature. The algorithm was applied to the first Chinese next-generation geostationary meteorological satellites (FY-4A) as a new science product.

## 2 Data and methods

### 2.1 Data

90 FY-4A was launched on December 11, 2016 with a longitude centered at 104.7° E (Yang et al., 2017). FY-4A data have been available since March 12, 2018 and can be downloaded from the FENGYUN Satellite Data Center (data.nsmc.org.cn). FY-4A has improved weather observations in several ways compared with the first generation of Chinese geostationary satellites (FY-2). For example, FY-4 is equipped with an Advanced Geosynchronous Radiation Imager (AGRI) with 14 spectral bands (FY-2 has five bands), with a resolution of 1 km in the visible bands (centered at 0.47, 0.65, and 0.825  $\mu\text{m}$ ), 2 km in the near-infrared bands (centered at 1.375, 1.61, 2.225, and 3.75  $\mu\text{m}$ ) and 4 km in the infrared bands (centered at 3.75, 6.25, 7.1, 8.5,  
95 10.8, 12.0, and 13.5  $\mu\text{m}$ ). FY-4 AGRI provides a full-disk scan every 15 minutes (FY-2 every 30 minutes) and the scan period is shorter over China (Chinese regional scan), which helps to identify and track convective clouds. FY-4 products have been used to retrieve the cloud mask, volcanic ash height and other scientific products (Min, 2017; Zhu et al., 2017).

The introduction of the near-infrared band makes it possible to retrieve  $R_e$  using FY-4 AGRI. Figure 1 shows the shortwave spectral characteristics of AGRI bands ( $<2 \mu\text{m}$ ) in the water vapour window. We used the 0.65 and 1.61  $\mu\text{m}$  channels to establish a bi-spectrum lookup table to retrieve the cloud optical thickness ( $\tau$ ) and  $R_e$ . Both channels have a signal-to-noise ratio  $>200$ . We selected FY-4 AGRI Chinese regional scan data from June 29 to June 30, 2018. Central and eastern China experienced heavy rain during the Meiyu period at this time and the Integrative Monsoon Frontal Rainfall Experiment was underway. Figure 2 shows an example of 0.65  $\mu\text{m}$  (Figure 2a), 1.61  $\mu\text{m}$  (Figure 2b), and 10.8  $\mu\text{m}$  (Figure 2c) channels of the AGRI and the three important parameters, including the solar zenith angle (Figure 2d), the viewing zenith angle (Figure 2e), and the relative azimuth (Figure 2f). These six parameters were used for the retrieval of the  $R_e$  profiles.

## 2.2 Methods

### 2.2.1 $R_e$ retrieval

The spectral  $R_e$  retrieval algorithms, in which the bi-spectral reflectance algorithm is the most representative, are based on the optical characteristics of the cloud itself. It was first proposed by Twomey and Seton (1980) to calculate  $\tau$  and  $R_e$ . Subsequently, Nakajima and King (1990) extended the scope of the retrieval algorithm and constructed a lookup table, which is currently the official algorithm for MODIS cloud properties. The basic principles of the retrieval algorithm are that the absorption of the cloud droplets is negligible in the visible band and the reflectance mainly depends on the value of  $\tau$ . In the near-infrared band, the reflection function mainly depends on the cloud particle radius: the smaller the radius, the greater the reflection function. This allows the simultaneous retrieval of  $\tau$  and  $R_e$ . This method has been widely used for the retrieval of cloud properties from multiple onboard instruments (Kawamoto et al., 2001; Fu, 2014; Letu et al., 2019).

We used libRadtran to construct a lookup table for the retrieval of cloud properties. libRadtran is a collection of C and Fortran functions and programs used to calculate solar and thermal radiation in the Earth's atmosphere (Mayer and Kylling, 2005; Emde et al., 2016). Specifically, the atmospheric molecular parameterization scheme selects the LOWTRAN scheme. For water clouds, we select Mie scheme which reads in pre-calculated Mie tables (<http://www.libradtran.org>). Single scattering properties of ice clouds are obtained from Yang et al. (2013) using the severely roughened aggregated column ice crystal habit. The atmospheric temperature and humidity profiles are the preset mid-latitude summer profiles. Considering that we are mainly concerned with cloud cluster with precipitation, in order to simplify the model and speed up the calculation, we closed the aerosol module. The setting of the surface type affects the surface albedo. We currently only set the two types of underlying surfaces, `mixed_forest` and `ocean_water`. The model simulation takes full account of the spectral response functions of the FY-4 AGRI 0.65 and 1.61  $\mu\text{m}$  channels.

The lookup table is as a function of  $\tau$ ,  $R_e$ , solar zenith angle (SZA), viewing zenith angle (VZA), and the relative azimuth (AZ) between the sun and the satellite. Table 1 summarizes the range and grid points for  $\tau$ ,  $R_e$ , SZA, VZA and AZ used in constructing lookup table. Figure 3 shows an example of  $\tau$  and  $R_e$  over `ocean_water` underlying surface for water cloud and ice cloud. The dashed lines represent reflectance contours for fixed  $\tau$ , and the solid lines are for fixed  $R_e$ . Since ice and liquid phase clouds have different scattering properties, it is critical to classify the cloud thermodynamic phase in the retrieval process.



It is generally believed that pixels with brightness temperature lower than 233 K are covered by ice clouds, and greater than 273 K are water clouds (Menzel and Strabala, 1997), and therefore the threshold for pure ice cloud and pure water cloud is 233 K and 273 K respectively. When the brightness temperature is between 233 K and 273 K, we bring the reflectance into the water-cloud and ice-cloud lookup table simultaneously. As shown in Figure 3, some combinations of reflectance are definitely ice clouds (or water clouds), and then they are treated as pure ice clouds (or water clouds), using the corresponding retrieval lookup table. Otherwise, the differences between the brightness temperature and 233 K (and 273 K) are used as the weights, multiplied by the retrieval values from the water-cloud (and ice-cloud) lookup table, and then divide the sum of the two by 40, to obtain the cloud parameters of the mixed-cloud pixel. Considering the fact that the thermal infrared channel providing key phase information has a resolution of 4 km (much coarser than MODIS of 1 km), there may be many possibilities such as pure water cloud, pure ice cloud, mixed cloud, multilayer cloud or broken cloud in the pixel. Please note that the current algorithm is difficult to handle multilayer cloud and broken cloud.

### 2.2.2 Cloud-cluster identification

The occurrence, development and dissipation of cloud clusters results in changes in their location, area, cloud-top temperature, average temperature and precipitation. The process of these changes is relatively continuous (Zhang and Fu, 2018) and continuous pixels with a certain feature are often used to identify a "cloud cluster" or convective system (Mapes and Houze, 1993; Zuidema, 2003; Chen et al., 2017; Chen and Fu, 2017; Huang et al., 2017). For example, Williams and Houze (1987) only considered continuous areas in which the brightness temperature was  $<213$  K when identifying and tracking cloud clusters. However, this algorithm is not suitable for the calculation of the vertical profile of  $R_e$  because it only calculates the core area of the convective cloud and ignores the vast areas of low clouds. It therefore cannot obtain a complete  $R_e$  profile in the vertical direction. If a higher brightness temperature threshold (e.g., 285 K) is used, it is possible to identify a cloud belt that is thousands of kilometers long (such as the Meiyu front system in China). It is not appropriate to treat such a large system as one cloud cluster.

The strong convective core of a cloud cluster appears as a low value in the brightness temperature and the surrounding brightness temperature increases as the distance from the core increases. Using this principle, we took the brightness temperature of the  $10.8 \mu\text{m}$  channel and calculated the maximum gradient direction of the brightness temperature of each pixel. We then searched sequentially along this direction until the local minimum point (the cloud convection core) was reached. If this point was marked, then a number of independent cloud clusters could be identified in a large system. The specific algorithm sequence is as follows.

1) The  $10.8 \mu\text{m}$  channel brightness temperature is pre-processed through a Gaussian filter with a standard deviation of 10 and truncated at 4 times the standard deviation. The cloud is assumed to be inhomogeneous and the AGRI instrument has inherent errors in the observations. This means that the final brightness temperature may change over a short horizontal distance. These changes are not physically identified as independent cloud clusters, but will affect the stability of the algorithm. Gaussian filtering can smooth out the noise of these local minima by retaining the cloud convective core.

165 2) The pre-processed 10.8  $\mu\text{m}$  brightness temperature is used to find the local temperature minimum. The local temperature minimum represents the center of the convective core, although there may be multiple convective cores around the lowest temperature core. These convective cores cannot be considered as independent cloud clusters in terms of short distance. Therefore, we first calculate the local temperature minimum of the complete scene (the brightness temperature is lower than the surrounding 8 pixels), and then set the distance threshold to 40 km (10 pixels). If the distance between two local minimums  
170 is lower than this threshold, they would be regarded as the same cloud cluster.

3) Combining the processed 10.8  $\mu\text{m}$  brightness temperature and the local minimum using the maximum temperature gradient method, a sequential search is carried out to determine the convective core to which each pixel belongs, thereby dividing the cloud clusters (Figure 4). Specifically, take the upper left cloud pixel of the pre-processed scene as the starting point, and calculate the brightness temperature gradient of it and its surrounding cloud pixels. Find the pixel that has the greatest  
175 brightness temperature gradient with the starting pixel and consider it as the next starting pixel. Repeat this calculation until the starting point is the local minimum obtained in step 2, and then the initial starting point belongs to the cloud cluster where this local minimum is located. After traversing all the cloud pixels as starting pixel in the scene, each cloud pixel can belong to a specific local minimum, thus an objective cloud cluster identification product can be obtained.

The scatter distribution of the  $R_e$  and temperature can be obtained by pairing the retrieved  $R_e$  of each pixel in the cloud cluster with the 10.8  $\mu\text{m}$  brightness temperature of the pixel itself.  $R_e$  is sorted by the brightness temperature and the median and other percentiles of  $R_e$  are calculated every 2.5 K. To eliminate the errors caused by extreme values, a sorting calculation is only  
180 performed in temperature intervals with  $>30$  samples. This allows us to obtain the  $R_e$  profile of the cloud cluster.

### 3 Results

The Meiyu is a persistent, almost stationary precipitation process in the Yangtze River Basin in early summer and can account  
185 for almost half of the annual precipitation in this region. The cloud system along the Meiyu front usually appears as a cloud belt with a latitudinal distribution of thousands of kilometers. It is distributed in the Sichuan Basin through the middle and lower reaches of the Yangtze River to Japan or the western Pacific Ocean. An intensive field campaign (the Integrative Monsoon Frontal Rainfall Experiment) was conducted from June to July 2018 to determine the nature of the Meiyu frontal system through satellite observations, aircraft observations and model simulations. However, the Meiyu period was short, the  
190 precipitation was weak, the rain belt was unstable, and only three Meiyu precipitation processes occurred in 2018 (atypical Meiyu year). According to the assumption of  $R_e$ -profile retrieval, wide temperature distribution is beneficial to gain a complete  $R_e$  profile, and therefore we selected a heavy precipitation event in the experiment to illustrate this retrieval algorithm.

Figure 5 shows that the value of  $\tau$  retrieved by Terra MODIS (Cloud\_Optical\_Thickness\_16) and the FY-4 AGRI has a good spatial consistency and there are two large centers of  $\tau$  at about ( $113^\circ$  E,  $30^\circ$  N) and ( $119^\circ$  E,  $29^\circ$  N), where the central value  
195 of  $\tau$  is  $>40$ . A cloud band with a moderate value of  $\tau$  occurs in the north of the two large centers ( $32\text{--}33^\circ$  N) where the value of  $\tau$  is about 20–40. There are regions of thin cloud and clear sky between these large- $\tau$  regions. Numerically, the value of  $\tau$

retrieved by the FY-4 AGRI is close to the MODIS result when the value of  $\tau$  is small and about 10% lower than the MODIS  $\tau$  when the value is large.

The  $R_e$  of the two instruments showed a similar spatial distribution. The value of the FY-4 AGRI  $R_e$  is also close to the MODIS result ([Cloud\\_Effective\\_Radius\\_16](#)) when the value is small, but different when the value is large. It is about 5  $\mu\text{m}$  lower than the MODIS  $R_e$  when the value is about 50  $\mu\text{m}$ . The MODIS shows more detail inside the cloud band than the FY-4 AGRI. For example, near (115° E, 34° N), the MODIS  $R_e$  shows multiple large-value areas, whereas the AGRI  $R_e$  is less conclusive in the same area. Similarly, in the discrimination of clear sky regions, the MODIS shows a more elaborate cloud boundary and some broken cloud regions are identified in the clear sky region. This is due to the difference in resolution between the two instruments. The horizontal resolution of the MODIS products is 1 km, whereas the horizontal resolution of the AGRI is 4 km, which inevitably leads to a lack of local detail.

Because the pixel position and spatial resolution of the FY-4 AGRI are different from those of the MODIS, the pixel-by-pixel results cannot be compared directly. The probability density function of  $\tau$  and  $R_e$  ([Figure 6](#)) in the region shown in [Figure 5](#) shows the similar distribution patterns of the two instruments. The values of  $\tau$  both show a unimodal distribution with a peak at around 5 and then rapidly decrease.  $R_e$  appears as a double peak, corresponding to water clouds and ice clouds. Some of the MODIS  $R_e$  values are >40  $\mu\text{m}$  (accumulated probability <10%) and the FY-4 AGRI observations do not retrieve these large particles. The MODIS results for  $\tau$  are slightly greater than the FY-4 AGRI results.

The difference shown in [Figure 6](#) is most likely due to the partial filling effect caused by different resolutions. Chen and Fu (2017) matched the high resolution visible pixel (~2 km) to the low resolution precipitation radar pixel (~5 km) [onboard Tropical Rainfall Measuring Mission satellite](#) and found that part of the area in the precipitation pixel measured by the radar was actually clear sky. This interpretation can also be used to explain [Figure 6](#). We suspect that isolated cirrus clouds with a large  $R_e$  value, low clouds with a small  $R_e$  value and clear skies co-exist in the 4 km region (the FY-4 AGRI pixel resolution) due to the horizontal inhomogeneity of the clouds (e.g. 115° E, 34.5° N and 112° E, 34° N in [Figure 5](#)), which means that the FY-4 AGRI only retrieves cloud properties from the overall reflectance, whereas the MODIS can obtain more detailed results. Ackerman et al. (2008) reported that the resolution has a significant impact on cloud observations and care should be taken when comparing results at different resolutions.

The different sensor zenith angle of the two instruments leads to different scattering angles, which have a large effect on the retrieval of the ice cloud  $R_e$ . Optically thin cirrus clouds ( $\tau < 0.3$ ) and the transition zones between cirrus clouds and clear skies are widely distributed in the tropics and subtropics and are difficult to observe with passive optical instruments (Fu et al., 2017). A large sensor zenith angle increases the path length through the upper troposphere, which causes the signals of thin cirrus clouds that are below the limit of resolution to be aggregated (Ackerman et al., 2008). For thin cirrus clouds generated by convective activity, the MODIS has a much better detection capability at the edge of the scan than along the center (Maddux et al., 2010). Maddux et al. (2010) used long-term composites to show that, even for the cloud product of the MODIS itself, the  $\tau$  value of the nadir is greater than the  $\tau$  value of the orbital boundary (~67°) by 5-10. The  $R_e$  value of the ice cloud shows differences of up to 10  $\mu\text{m}$  between the near-nadir and near-edge of scans over land.

The difference in resolution of the instruments leads to a difference in the retrieval results. The MODIS L3 product releases the cloud properties on a  $1^\circ$  grid. To make the retrieval results comparable, we gridded the FY-4 AGRI retrievals to this resolution in the region shown in Figure 5. In the process of gridding,  $R_e$  was taken as the arithmetic mean of all the cloud pixels in the grid. In view of the physical meaning of  $\tau$  itself, direct arithmetic averaging without considering the pattern of distribution within the grid produced a maximum error of 20% (Chen et al., 2019). We therefore used the logarithmic mean to average  $\tau$  to a  $1^\circ$  grid. Figure 7 shows that, regardless of the value of  $\tau$  or  $R_e$ , the results showed a good correlation at a  $1^\circ$  grid point. The correlation coefficient of  $\tau$  reached 0.959 and the correlation coefficient of  $R_e$  reached 0.933.

The retrieval of cloud properties based on FY-4 AGRI was carried out successfully. Figure 8 shows the clustering result from the maximum temperature gradient method. As described in Section 2.2.2, Gaussian filtering was performed on the  $10.8 \mu\text{m}$  brightness temperature before clustering, which filtered out broken clouds. The area seen as clear sky in Figure 8b (white) is therefore greater than that in Figure 5. The  $10.8 \mu\text{m}$  bright temperature (Figure 8a) shows that there is a convective center consisting of three relatively close convective cells near ( $113^\circ \text{ E}$ ,  $30^\circ \text{ N}$ ) and the minimum brightness temperature is  $<200 \text{ K}$ . The convective center extends to the southwest as a slender cloud band, which is consistent with the conveyor belt of water vapor during the Meiyu season. The eastern side of the convective center shows another distinct mesoscale convective system with a center at ( $119.5^\circ \text{ E}$ ,  $29^\circ \text{ N}$ ) and a minimum brightness temperature of about  $210 \text{ K}$ . There is a cloud band with a brightness temperature ranging from  $220$  to  $260 \text{ K}$  in the north of the two main convective clouds. There are many small-scale clouds in the north of this cloud belt.

The results of automatic clustering are consistent with subjective cognition, showing two main convective cloud clusters and several small cloud clusters on the north side. Our focus is on the convective cloud cluster on the southwest of the figure (the purple cloud cluster in Figure 8b), which produced the heaviest precipitation in the Integrative Monsoon Frontal Rainfall Experiment. The lightning generated by this cloud even destroyed some ground-based instruments. The  $R_e$  profile is shown in Figure 8d, where each red dot corresponds to the pixel-by-pixel retrieval of  $R_e$  in the cloud cluster and the black line is the median value of  $R_e$ .

Geostationary satellites enable the continuous observation of the same area, which helps to identify and track the occurrence, development and dissipation of cloud clusters. Zhang and Fu (2018) proposed that life stage of clouds affect the convection ratio, the precipitation area, the vertical structure and characteristics of precipitation droplets. Using the FY-4 AGRI observations, we achieved the objective segmentation of the cloud and brought the segmentation result (cloud cluster) into the continuous observations to automatically track the cloud clusters. Figure 9 tracks the purple cloud cluster shown in Figure 7. From the perspective of the brightness temperature, there were three adjacent cells with a low temperature on the west side at 00:30 UTC and a large low-temperature zone on the east side. The pattern of cells was irregularly and they were randomly embedded in cloud bands (initiation). By 03:30 UTC, the three cells on the west side had merged to form one cloud cluster (black line), whereas the convective clouds on the east side had gradually dissipated. The convective core appeared to be a linear shape, accompanied with a large area of southwestern trailing cloud (mature). At 05:30 UTC, the cloud cluster on the west side had started to dissipate and a slender arcus cloud developed on the eastern boundary with a minimum brightness

265 temperature <200 K. The heavy precipitation of the cloud cluster on the west side (black line) may have caused a local  
downburst. These cold airflows sink to the ground and flow out to the boundary of the cloud, forming a localized area of ascent  
with the strong solar heating in the afternoon (~13:30 local time). This closed circulation created a new, strongly convective  
cloud at the original cloud boundary. The original convective cloud cluster dissipated and the newly formed convective cloud  
cluster on the east side gradually developed and matured. From the perspective of the tracked cloud (black line), our objective  
270 tracking results successfully described the development and dissipation of this cloud cluster without confusing it with the  
newly generated convective cloud cluster in the east.

[Figure 10](#) shows the evolution of the  $R_e$  vertical profile for the automatically tracked cloud cluster. In terms of the area of the  
cluster, the rapid growth and development period of the cloud cluster was from 00:30 to 02:30 UTC. The cloud cluster area  
was relatively stable from 02:30 to 06:30 UTC, after which time the area was slightly decreased. In agreement with the theory  
275 of Rosenfeld and Lensky (1998), the change in  $R_e$  with temperature can be divided into five distinct zones: the diffusional  
droplet growth zone; the droplet coalescence growth zone; the rainout zone; the mixed phase zone; and the glaciated zone.  
These five areas do not all necessarily appear in a given cloud cluster.

Only the [small convective cell](#) was identified at 00:30 UTC and it did not contain enough pixels with high temperature (<30  
samples in 2.5-K temperature interval). Although there must be a region for particles to condense and coalesce within this  
280 cloud cluster, due to technical limitations, only glaciated zone was shown in the  $R_e$  profile ([Figure 10a](#)). At 01:30 UTC,  
convective cells merged and the convection activity was strong. The  $R_e$  profile showed that, in areas where the temperature  
was <230 K,  $R_e$  was stable in the glaciated zone from 28 to 32  $\mu\text{m}$ .  $R_e$  changed almost linearly with temperature between 285  
and 230 K and did not exhibit a clear boundary between the diffusional growth zone, the coalescence growth zone, the rainout  
zone and the mixed phase zone. This is because strong convective core usually has a strong ascending motion. Under the  
285 influence of such strong ascending motion, the boundary between the zones is broken and there is not enough time for the  
growth of precipitation ([Figure 10b](#)). Rosenfeld et al. (2008) explained that this situation may delay the development of both  
the mixed and ice phases at higher altitudes and that the resulting linear  $R_e$  profile is a warning of severe weather.

The  $R_e$  profile gradually showed multiple zones from 02:30 to 03:30 UTC, and the regional difference is most distinct from  
04:30 to 05:30. The median  $R_e$  slowly increased with temperature from 10 to 16  $\mu\text{m}$  (~285 K to 270 K), which is the growth  
290 zone in which cloud droplets are mainly condensed and is affected by the number of CCN. The growth rate of  $R_e$  accelerated  
significantly from 16 to 22  $\mu\text{m}$  (~270 K to 265 K). At this time, raindrops were formed and the growth of cloud droplets mainly  
depended on coalescence. The distinct zones can also be seen in the 25 and 75 percentiles, while the turning points of  $R_e$  and  
the growth rates differ from the median. The rainout zone usually appears in marine cloud systems with fewer CCN (Martins  
et al., 2011), whereas this precipitation process was located in inland China. A large number of artificial aerosols act as CCN  
295 to suppress warm rain while delaying freezing, which requires lower temperatures. From ~265 to ~230 K, the rate of increase  
in  $R_e$  slightly slows down. The cloud particles gradually change from the liquid phase to the ice phase and their radius increases  
and absorbs more near-infrared radiation (mixed phase zone).  $R_e$  remains stable below 230 K and the profile is completely in  
the glaciated zone. After 06:30 UTC, the intensity of the original cloud cluster was significantly weakened and gradually

dissipated. The  $R_e$  profile gradually became difficult to describe. This is due to the weakening of convective activity, the cloud cluster is mainly governed by a thinning anvil. Affected by the low-level clouds and high-level anvils, the uncertainty of  $R_e$  retrieval increases, and the bright temperature cannot represent the cloud-top temperature at this time, which reduces the credibility of the  $R_e$  profile.

#### 4 Conclusions

FY-4A is the first Chinese next-generation geostationary meteorological satellites. It was launched in 2016 and began operation in 2018. Here, bi-spectral reflectance algorithm was used to retrieve  $R_e$  and  $\tau$ . We used the maximum temperature gradient method to automatically segment, identify and track cloud clusters. We obtained the objective cloud cluster  $R_e$  profile retrieval method based on FY-4 AGRI observations by combining these two methods. Taking a severe weather event during the Integrative Monsoon Frontal Rainfall Experiment campaign as an example, we calculated the  $R_e$  profiles of an objective cloud cluster at different life stages.

The cloud properties of  $R_e$  and  $\tau$  retrieved from the FY-4 AGRI were compared with the Terra MODIS cloud products. The results showed that they were in good agreement with the spatial distribution, although there were some differences when the value was large, which may be due to the difference in resolution and the viewing zenith angles. The results showed a strong correlation when the FY-4 AGRI and MODIS retrievals were both averaged to a  $1^\circ$  grid. This indicates that the cloud properties retrieved by the FY-4 AGRI were credible.

The maximum temperature gradient method effectively divides thousands of kilometers of cloud bands into multiple cloud clusters and the objective results are consistent with subjective cognition. For this specific severe weather event, the method tracked the complete process of development, maturation and dissipation of a convective cloud cluster. The  $R_e$  profiles of the cloud cluster showed completely different characteristics at different life stages. During the development stage,  $R_e$  changed almost linearly with temperature, whereas during the mature stage the  $R_e$  profile showed multiple zones of changes with temperature. Different  $R_e$  profiles reflected the different physical processes of cloud particle growth and corresponded to completely different processes of formation of precipitation.

The use of geostationary satellites to obtain continuous cloud cluster  $R_e$  vertical profiles has led to many different applications. For example, the  $R_e$  profile of the development stage is linear, which may help to improve the predictive skill for the nowcasting of storms. Real-time changes in the shape of the  $R_e$  profile may also be used to characterize the life stages of clouds. The position of the glaciation temperature and the mixed phase zone in the  $R_e$  profile indicates the formation of mixed-layer precipitation. The continuous change in the glaciation temperature helps our understanding of mixed-layer precipitation. We are confident that the introduction of the cloud cluster  $R_e$  profile will help to improve the future application of FY-4 data in meteorology.

The authors declare that they have no conflict of interest.

*Data availability.* Data supporting this paper can be found at <http://www.nsmc.org.cn>.

*Author contributions.* Conceptualization: YC; Investigation: YC, GC and AZ; Methodology: YC, GC and AZ; Writing: YC;  
335 Validation & Discussion & Editing: CC, RW, SZ, DW and YF; Supervision: YF.

## **Acknowledgment**

This research was supported by NSFC Project under Grant 41620104009, the National Key R&D Program of China under grant 2017YFC1501402, and the Key research and development projects in Anhui province under grant 201904a07020099.

340

## **References**

- Ackerman, S. A., et al.: Cloud detection with MODIS. Part II: Validation, *J Atmos Ocean Tech*, 25(7), 1073-1086, doi:10.1175/2007JTECHA1053.1, 2008.
- Andreae, M. O., et al.: Smoking rain clouds over the Amazon, *Science*, 303(5662), 1337-1342, doi:10.1126/science.1092779,  
345 2004.
- Ansmann, A., et al.: Influence of Saharan dust on cloud glaciation in southern Morocco during the Saharan Mineral Dust Experiment, *Journal of Geophysical Research*, 113(D4), doi:10.1029/2007JD008785, 2008.
- Braga, R. C., et al.: Further evidence for CCN aerosol concentrations determining the height of warm rain and ice initiation in convective clouds over the Amazon basin, *Atmos Chem Phys*, 17(23), 14433-14456, doi:10.5194/acp-17-14433-2017, 2017.
- 350 Chang, F. and Li, Z.: Estimating the vertical variation of cloud droplet effective radius using multispectral near-infrared satellite measurements, *Journal of Geophysical Research*, 107(D15), doi:10.1029/2001JD000766, 2002.
- Chang, F. and Li, Z.: Retrieving vertical profiles of water-cloud droplet effective radius: Algorithm modification and preliminary application, *Journal of Geophysical Research: Atmospheres*, 108(D24), n/a-n/a, doi:10.1029/2003JD003906, 2003.
- Chen, Y., et al.: Characteristics of cloud cluster over the steep southern slopes of the Himalayas observed by CloudSat, *Int J*  
355 *Climatol*, 37(11), 4043-4052, doi:10.1002/joc.4992, 2017.
- Chen, Y. and Fu, Y.: Characteristics of VIRS Signals within Pixels of TRMM PR for Warm Rain in the Tropics and Subtropics, *J Appl Meteorol Clim*, 56(3), 789-801, doi:10.1175/JAMC-D-16-0198.1, 2017.
- Chen, Y., et al.: Impacts of distribution patterns of cloud optical depth on the calculation of radiative forcing, *Atmos Res*, 218, 70-77, doi:10.1016/j.atmosres.2018.11.007, 2019.

- 360 Delanoe, J. and Hogan, R. J.: Combined CloudSat-CALIPSO-MODIS retrievals of the properties of ice clouds, *J. Geophys. Res.*, 115, D00H29, doi: 10.1029/2009JD012346 2010
- Deng, M., et al.: Evaluation of Several A-Train Ice Cloud Retrieval Products with In Situ Measurements Collected during the SPARTICUS Campaign. *J. Appl. Meteor. Climatol.*, 52, 1014–1030, doi:10.1175/JAMC-D-12-054.1, 2013.
- Emde, C., et al.: The libRadtran software package for radiative transfer calculations (version 2.0.1), *Geosci Model Dev*, 9(5),  
365 1647-1672, doi:10.5194/gmd-9-1647-2016, 2016.
- Ewald, F., Zinner, T., Kölling, T., and Mayer, B.: Remote sensing of cloud droplet radius profiles using solar reflectance from cloud sides - Part 1: Retrieval development and characterization, *Atmos. Meas. Tech.*, 12, 1183-1206, <https://doi.org/10.5194/amt-12-1183-2019>, 2019.
- Freud, E. and Rosenfeld, D.: Linear relation between convective cloud drop number concentration and depth for rain initiation,  
370 *Journal of Geophysical Research: Atmospheres*, 117(D2), doi:10.1029/2011JD016457, 2012.
- Fu, Y.: Cloud parameters retrieved by the bispectral reflectance algorithm and associated applications, *J Meteorol Res*, 28(5), 965-982, doi:10.1007/s13351-014-3292-3, 2014.
- Fu, Y., et al.: Lateral Boundary of Cirrus Cloud from CALIPSO Observations, *Sci Rep*, 7, doi:10.1038/s41598-017-14665-6, 2017.
- 375 Huang, Y. P., et al.: Distribution and variability of satellite-derived signals of isolated convection initiation events over central eastern China, *J Geophys Res-Atmos*, 122(21), 11357-11373, doi:10.1002/2017JD026946, 2017.
- Kawamoto, K., et al.: A global determination of cloud microphysics with AVHRR remote sensing, *J Climate*, 14(9), 2054-2068, doi:10.1175/1520-0442(2001)014<2054:AGDOCM>2.0.CO;2, 2001.
- King, N. J. and Vaughan, G.: Using passive remote sensing to retrieve the vertical variation of cloud droplet size in marine  
380 stratocumulus: An assessment of information content and the potential for improved retrievals from hyperspectral measurements, *Journal of Geophysical Research: Atmospheres*, 117(D15), doi:10.1029/2012JD017896, 2012.
- Lensky, I. M. and Rosenfeld, D.: The time-space exchangeability of satellite retrieved relations between cloud top temperature and particle effective radius, *Atmos Chem Phys*, 6, 2887-2894, doi:10.5194/acp-6-2887-2006, 2006.
- Letu, H., et al.: Ice cloud properties from Himawari-8/AHI next-generation geostationary satellite: capability of the AHI to  
385 monitor the dc cloud generation process, *IEEE T Geosci Remote*, 57(6), 3229-3239, doi:10.1109/TGRS.2018.2882803, 2019.
- Liou, K. N.: Influence of cirrus clouds on weather and climate processes: a global perspective, *Mon Weather Rev*, 114(6), 1167-1199, 1986.
- Maddux, B. C., et al.: Viewing Geometry Dependencies in MODIS Cloud Products, *J Atmos Ocean Tech*, 27(9), 1519-1528, doi:10.1175/2010JTECHA1432.1, 2010.
- 390 Mapes, B. E. and Houze, R. A.: Cloud clusters and superclusters over the oceanic warm pool, *Mon Weather Rev*, 121(5), 1398-1415, 1993.
- Martins, J. V., et al.: Remote sensing the vertical profile of cloud droplet effective radius, thermodynamic phase, and temperature, *Atmos Chem Phys*, 11(18), 9485-9501, doi:10.5194/acp-11-9485-2011, 2011.



- 395 Mayer, B. and Kylling, A.: Technical note: The libRadtran software package for radiative transfer calculations - description and examples of use, *Atmos Chem Phys*, 5, 1855-1877, doi:10.5194/acp-5-1855-2005, 2005.
- [Menzel, P. and Strabala K.: Cloud top properties and cloud phase algorithm theoretical basis document, University of Wisconsin-Madison, 1997.](#)
- Min, M., et al.: Developing the Science Product Algorithm Testbed for Chinese Next-Generation Geostationary Meteorological Satellites: Fengyun-4 Series, *J Meteorol Res-Prc*, 31(4), 708-719, doi:10.1007/s13351-017-6161-z, 2017.
- 400 Nakajima, T. and King, M. D.: Determination of the optical-thickness and effective particle radius of clouds from reflected solar-radiation measurements .1. Theory, *J Atmos Sci*, 47(15), 1878-1893, doi:10.1175/1520-0469(1990)047<1878:DOTOTA>2.0.CO;2, 1990.
- [Oki T. and Kanae S.: Global hydrological cycles and world water resources, Science, 313\(5790\): 1068-1072, doi: 10.1126/science.1128845, 2006.](#)
- 405 Painemal, D. and Zuidema, P.: Assessment of MODIS cloud effective radius and optical thickness retrievals over the Southeast Pacific with VOCALS-REx in situ measurements, *Journal of Geophysical Research: Atmospheres*, 116(D24), doi:10.1029/2011JD016155, 2011.
- Pawlowska, H., et al.: Microphysical properties of stratocumulus clouds, *Atmos Res*, 55(1), 15-33, doi:https://doi.org/10.1016/S0169-8095(00)00054-5, 2000.
- 410 Platnick, S.: Vertical photon transport in cloud remote sensing problems, *Journal of Geophysical Research: Atmospheres*, 105(D18), 22919-22935, doi:10.1029/2000JD900333, 2000.
- Prabha, T. V., et al.: Microphysics of premonsoon and monsoon clouds as seen from in situ measurements during the Cloud Aerosol Interaction and Precipitation Enhancement Experiment (CAIPEEX), *J Atmos Sci*, 68(9), 1882-1901, doi:10.1175/2011JAS3707.1, 2011.
- 415 Rangno, A. L. and Hobbs, P. V.: Microstructures and precipitation development in cumulus and small cumulonimbus clouds over the warm pool of the tropical Pacific Ocean, *Q J Roy Meteor Soc*, 131(606B), 639-673, 2005.
- Rosenfeld, D. and Gutman, G.: Retrieving microphysical properties near the tops of potential rain clouds by multispectral analysis of AVHRR data, *Atmos Res*, 34(1-4), 259-283, doi:10.1016/0169-8095(94)90096-5, 1994.
- Rosenfeld, D. and Lensky, I. M.: Satellite-based insights into precipitation formation processes in continental and maritime convective clouds, *B Am Meteorol Soc*, 79(11), 2457-2476, doi:10.1175/1520-0477(1998)079<2457:SBIIPF>2.0.CO;2, 1998.
- 420 Rosenfeld, D.: TRMM observed first direct evidence of smoke from forest fires inhibiting rainfall, *Geophys Res Lett*, 26(20), 3105-3108, doi:10.1029/1999GL006066, 1999.
- Rosenfeld, D.: Suppression of rain and snow by urban and industrial air pollution, *Science*, 287(5459), 1793-1796, doi:10.1126/science.287.5459.1793, 2000.
- 425 Rosenfeld, D., et al.: Satellite-retrieved microstructure of AgI seeding tracks in supercooled layer clouds, *Journal of Applied Meteorology*, 44(6), 760-767, doi:10.1175/JAM2225.1, 2005.

- Rosenfeld, D., et al.: Aircraft microphysical documentation from cloud base to anvils of hailstorm feeder clouds in Argentina, *J Appl Meteorol Clim*, 45(9), 1261-1281, doi:10.1175/JAM2403.1, 2006.
- Rosenfeld, D., et al.: Inverse relations between amounts of air pollution and orographic precipitation, *Science*, 315(5817), 1396-1398, 2007.
- Rosenfeld, D., et al.: Satellite detection of severe convective storms by their retrieved vertical profiles of cloud particle effective radius and thermodynamic phase, *Journal of Geophysical Research*, 113(D4), doi:10.1029/2007JD008600, 2008.
- Rosenfeld, D., et al.: Glaciation temperatures of convective clouds ingesting desert dust, air pollution and smoke from forest fires, *Geophys Res Lett*, 38(21), n/a-n/a, doi:10.1029/2011GL049423, 2011.
- Rosenfeld, D., et al.: Aerosol effects on microstructure and intensity of tropical cyclones, *B Am Meteorol Soc*, 93(7), 987-1001, 2012.
- Rosenfeld, D., et al.: The roles of cloud drop effective radius and LWP in determining rain properties in marine stratocumulus, *Geophys Res Lett*, 39(13), n/a-n/a, doi:10.1029/2012GL052028, 2012.
- Rosenfeld, D.: Chapter 6 - Cloud-aerosol-precipitation interactions based of satellite retrieved vertical profiles of cloud microstructure, edited, pp. 129-152, Elsevier Inc, doi:10.1016/B978-0-12-810437-8.00006-2, 2018.
- Rossow, W. B. and Schiffer, R. A.: Advances in understanding clouds from ISCCP, *B Am Meteorol Soc*, 80(11), 2261-2287, 1999.
- Suzuki, K., et al.: Particle growth and drop collection efficiency of warm clouds as inferred from joint CloudSat and MODIS observations, *J Atmos Sci*, 67(9), 3019-3032, doi:10.1175/2010JAS3463.1, 2010.
- Suzuki, K., et al.: Diagnosis of the warm rain process in cloud-resolving models using joint CloudSat and MODIS observations, *J Atmos Sci*, 68(11), 2655-2670, doi:10.1175/JAS-D-10-05026.1, 2011.
- Twomey, S. and Seton, K. J.: Inferences of gross microphysical properties of clouds from spectral reflectance measurements, *J Atmos Sci*, 37(5), 1065-1069, doi:10.1175/1520-0469(1980)037<1065:IOGMPO>2.0.CO;2, 1980.
- Wendisch, M., et al.: Acridicon–chuva campaign: studying tropical deep convective clouds and precipitation over Amazonia using the new German research aircraft HALO, *B Am Meteorol Soc*, 97(10), 1885-1908, doi:10.1175/BAMS-D-14-00255.1, 2016.
- Wetherald, R. T. and Manabe, S.: Cloud feedback processes in a general-circulation model, *J Atmos Sci*, 45(8), 1397-1415, 1988.
- Williams, M. and Houze, R. A.: Satellite-observed characteristics of winter monsoon cloud clusters, *Mon Weather Rev*, 115(2), 505-519, 1987.
- Yang, J., et al.: Introducing the new generation of Chinese geostationary weather satellites, FENGYUN-4., *B Am Meteorol Soc*, 98(8), 1637-1658, doi:10.1175/BAMS-D-16-0065.1, 2017.
- Yang, P., et al.: Spectrally consistent scattering, absorption, and polarization properties of atmospheric ice crystals at wavelengths from 0.2 to 100  $\mu\text{m}$ , *J. Atmos. Sci.*, 70, 330–347, doi:10.1175/JAS-D-12-039.1, 2013.

- 460 Zhang, A. and Fu, Y.: Life cycle effects on the vertical structure of precipitation in east china measured by Himawari-8 and GPM DPR, *Mon Weather Rev*, 146, 2183-2199, 2018.
- Zheng, Y. and Rosenfeld, D.: Linear relation between convective cloud base height and updrafts and application to satellite retrievals, *Geophys Res Lett*, 42(15), 6485-6491, doi:10.1002/2015GL064809, 2015.
- Zhu, L., et al.: Retrieval of volcanic ash height from satellite-based infrared measurements, *J Geophys Res-Atmos*, 122(10),  
465 5364-5379, doi:10.1002/2016JD026263, 2017.
- Zuidema, P.: Convective clouds over the Bay of Bengal, *Mon Weather Rev*, 131(5), 780-798, 2003.

**Table 1. Grid point values of the lookup table parameters.**

| Quantity                | # of points | Grid point values                                                                                                                                                                                                        |
|-------------------------|-------------|--------------------------------------------------------------------------------------------------------------------------------------------------------------------------------------------------------------------------|
| $\tau$                  | 34          | 0.05, 0.10, 0.25, 0.5, 0.75, 1.0, 1.25, 1.5, 1.75, 2.0, 2.39, 2.87, 3.45, 4.14, 4.97, 6.0, 7.15, 8.58, 10.30, 12.36, 14.83, 17.80, 21.36, 25.63, 30.76, 36.91, 44.30, 53.16, 63.80, 76.56, 91.88, 110.26, 132.31, 158.78 |
| $R_e$ ( $\mu\text{m}$ ) | 15          | 4,5,6,7,8,9,10,12,14,16,18,20,22,24,25 (liquid water cloud)                                                                                                                                                              |
|                         | 18          | 5,8,11,14,17,21,24,27,30,33,36,39,42,45,48,53,57,60 (ice cloud)                                                                                                                                                          |
| SZA( $^\circ$ )         | 17          | [0, 80] equally spaced with increments of $5^\circ$                                                                                                                                                                      |
| VZA ( $^\circ$ )        | 17          | [0,80] equally spaced with increments of $5^\circ$                                                                                                                                                                       |
| ZA( $^\circ$ )          | 19          | [0, 180] equally spaced with increments of $10^\circ$                                                                                                                                                                    |

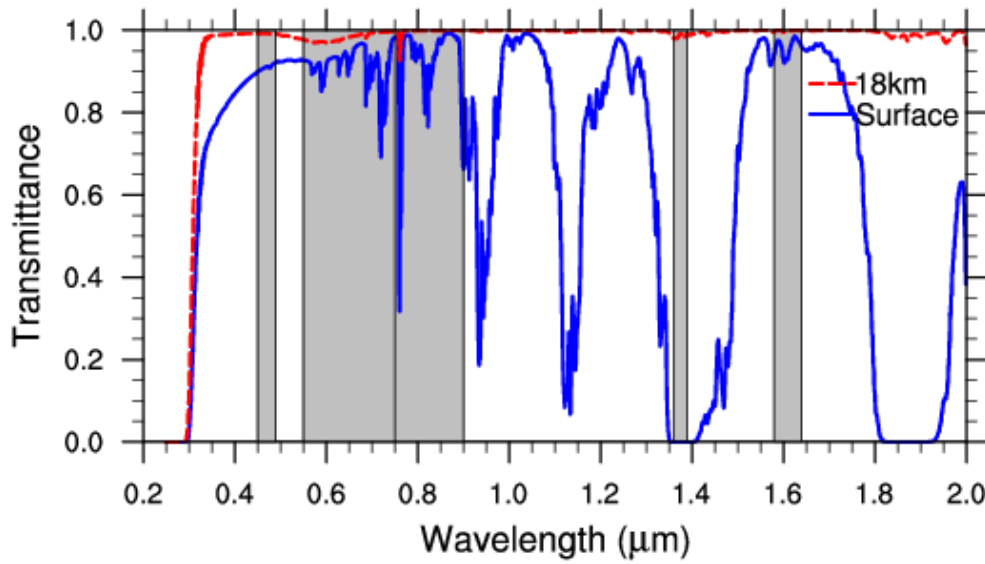

Figure 1: Spectral characteristics of FY-4 AGRI bands centered at 0.47, 0.65, 0.825, 1.375 and 1.61  $\mu\text{m}$ . The atmospheric transmittance is calculated for the mid-latitude summer temperature and humidity profiles at a solar zenith angle of  $10^\circ$ .

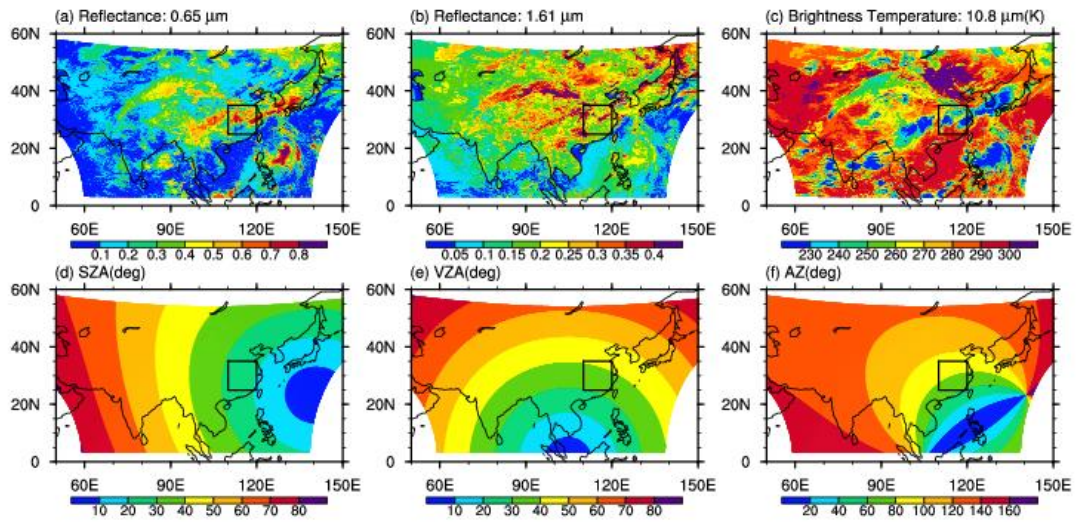

**Figure 2: Chinese regional scans and geolocation results of FY-4 AGRI at 02:38 (UTC) on June 30, 2018. (a) Reflectance at 0.65  $\mu\text{m}$ ; (b) reflectance at 1.61  $\mu\text{m}$ ; (c) brightness temperature at 10.8  $\mu\text{m}$ (K); (d) solar zenith angle (SZA); (e) viewing zenith angle (VZA); and (f) relative azimuth (AZ). The domain shown in Figure 4 is indicated.**

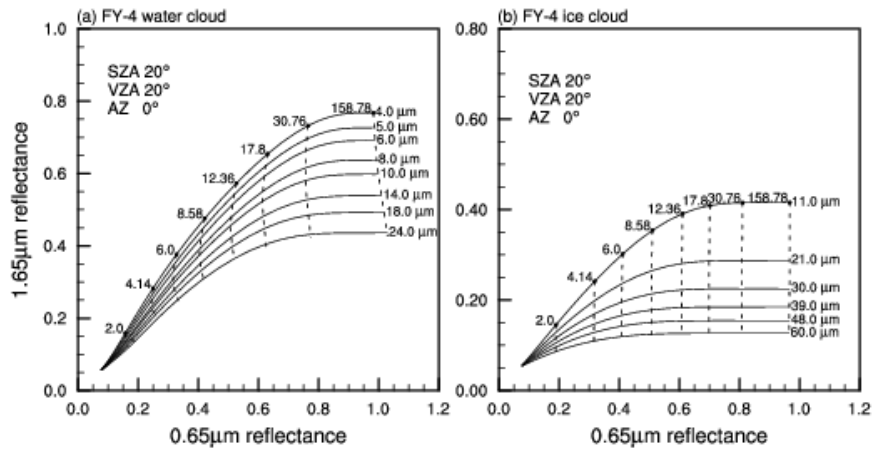

Figure 3: Bi-spectral reflectance lookup table for FY-4 AGRI. Here, solar zenith angle=20°, viewing zenith angle=20°, relative azimuth=0°, and underlying surface=ocean\_water.

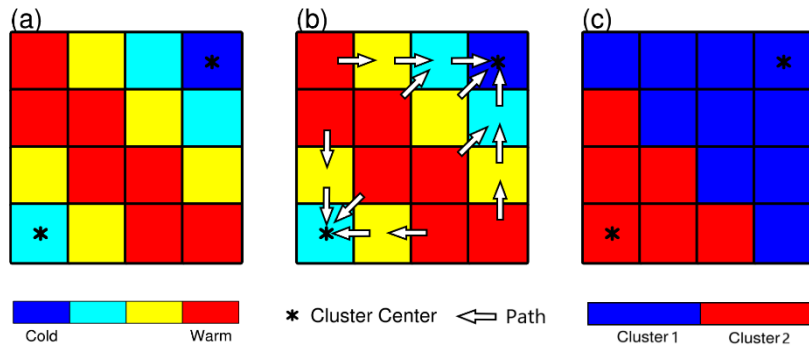

485

Figure 4: schematic diagram for the maximum temperature gradient method. (a) distribution of the brightness temperature; (b) maximum brightness temperature gradient path of each cloud pixel; (c) the objective cloud cluster identification product. Please note that the local temperature minimums (asterisks) in the figure is only used to illustrate the maximum temperature gradient method. In actual calculation, the distance between the two local temperature minimums is greater than 40 km (~10 pixels).

490



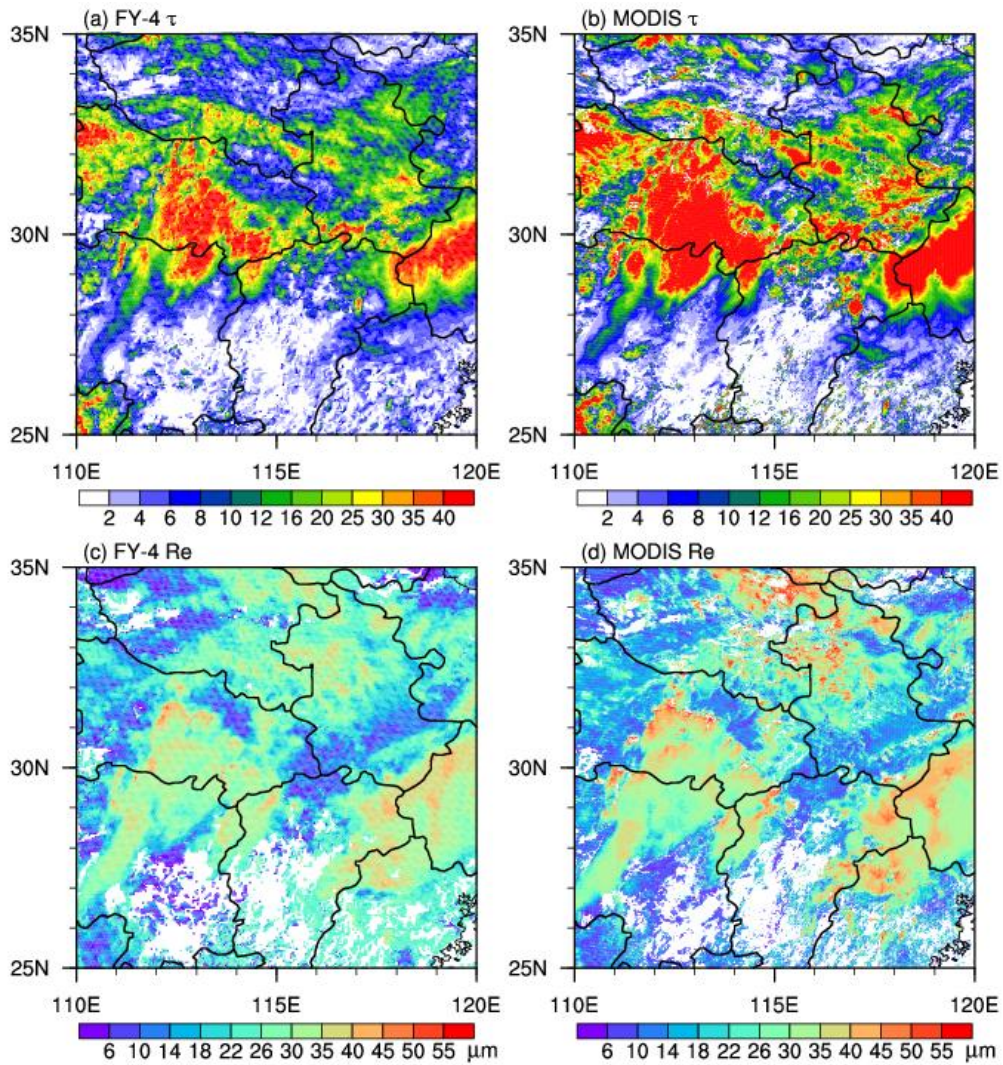

**Figure 5:** Comparison of the pixel-level retrieval of cloud properties using the FY-4 AGRI with Terra MODIS cloud products ([Cloud\\_Optical\\_Thickness\\_16](#) and [Cloud\\_Effective\\_Radius\\_16](#)). The observation time of the FY-4 AGRI is 02:38 (UTC) on June 30, 2018 and the MODIS observation time is 02:55 (UTC). The solid lines are provincial boundaries.

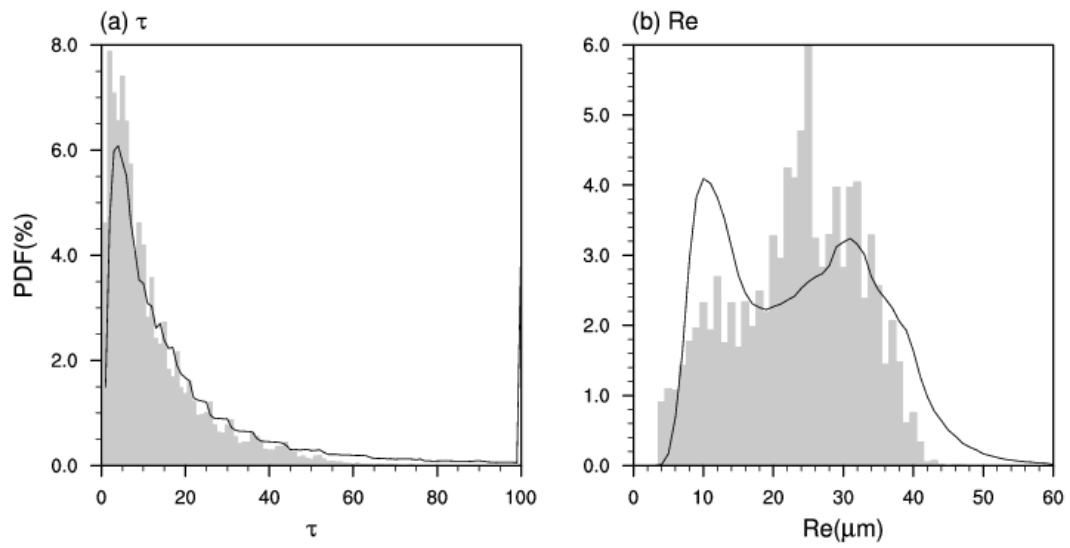

**Figure 6:** Probability density function of the FY-4 AGRI retrieval results and the MODIS cloud products in the region shown in Figure 5. The shaded area shows the FY-4 AGRI results and the solid line is the MODIS results.

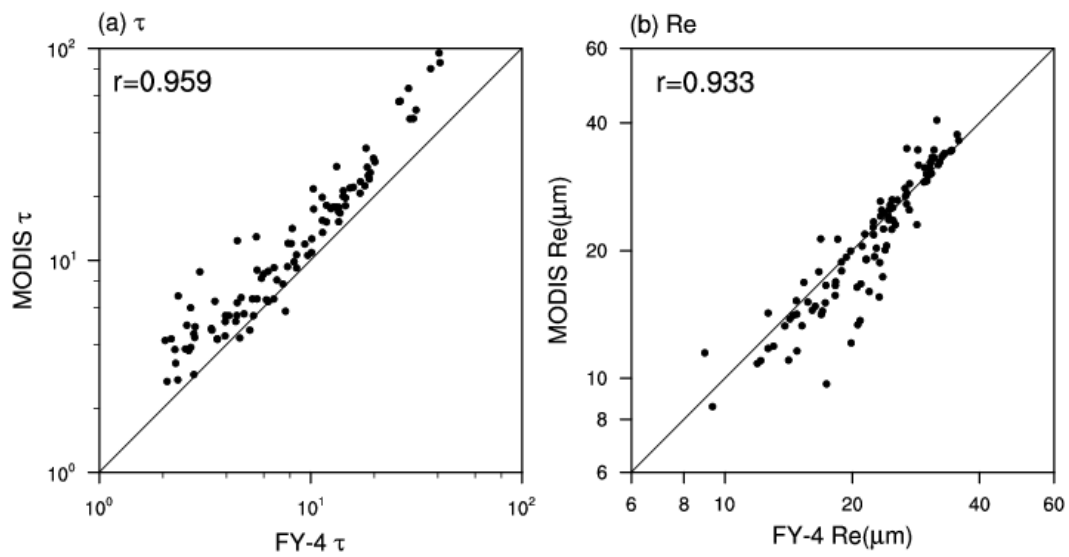

500

**Figure 7:** Scatter plots of FY-4 AGRI and MODIS retrievals after averaging to a  $1^\circ$  grid in the region shown in Figure 5.

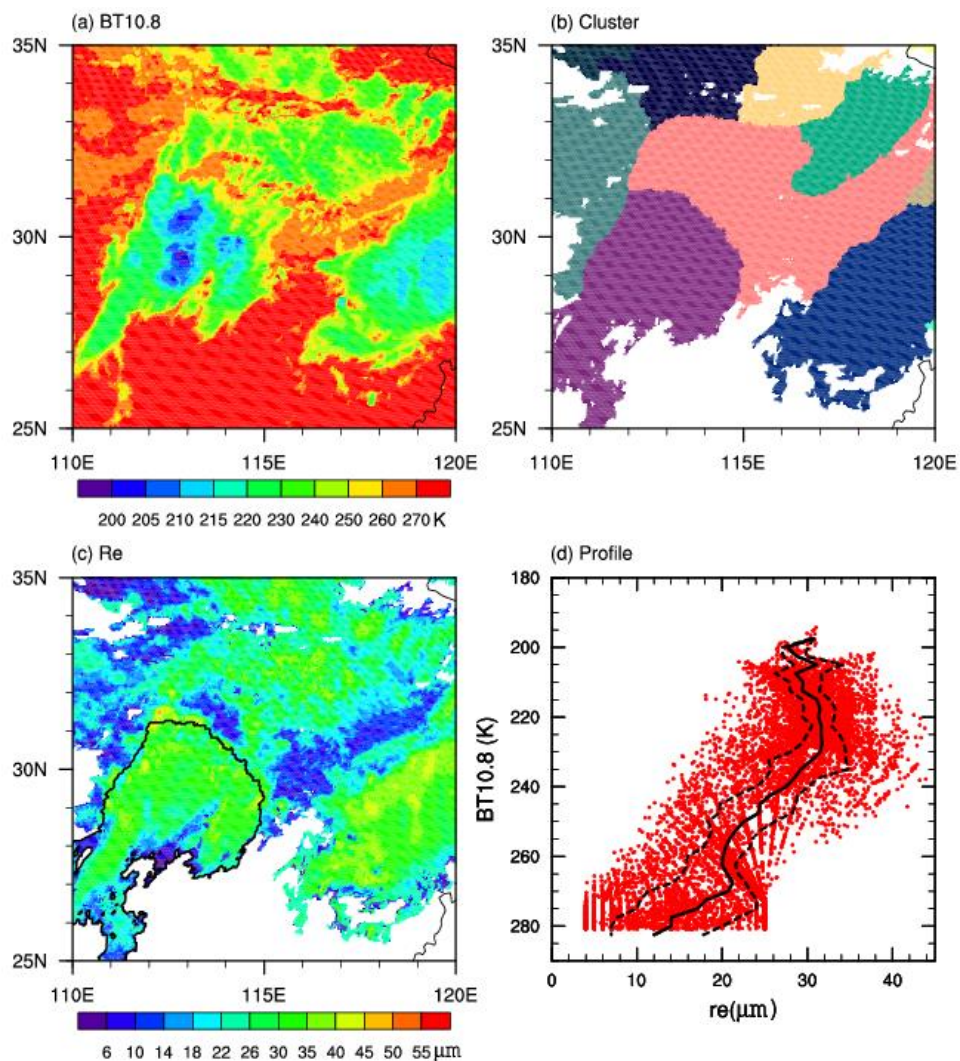

505 **Figure 8:** Cloud cluster identification and the corresponding Re profile for the FY-4 AGRI observations in Figure 3 at 02:38 UTC on June 30, 2018. (a) 10.8  $\mu\text{m}$  brightness temperature; (b) cloud cluster identification; (c) a specific cloud cluster identified by our algorithm with a base map of Re; and (d) Re profile of the specific cloud cluster.

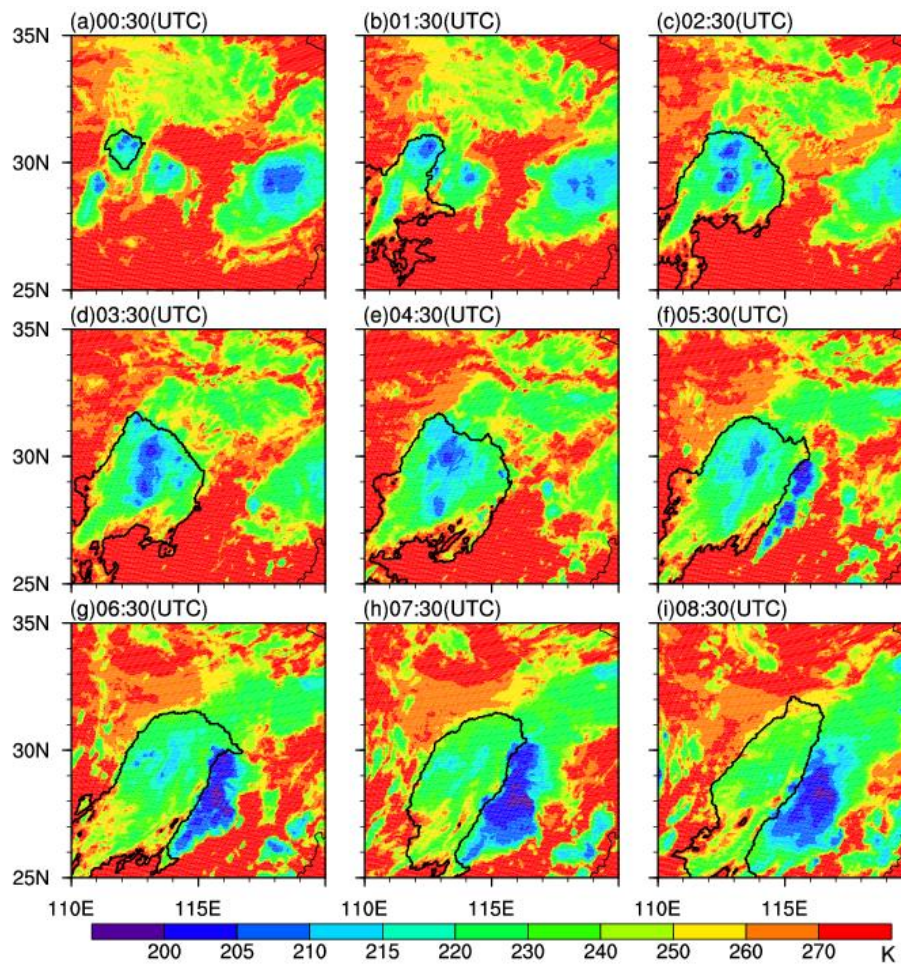

510 **Figure 9:** Cloud cluster tracking on June 30, 2018 (one hour intervals). The black line is the continuous cloud cluster identified by the maximum temperature gradient method.

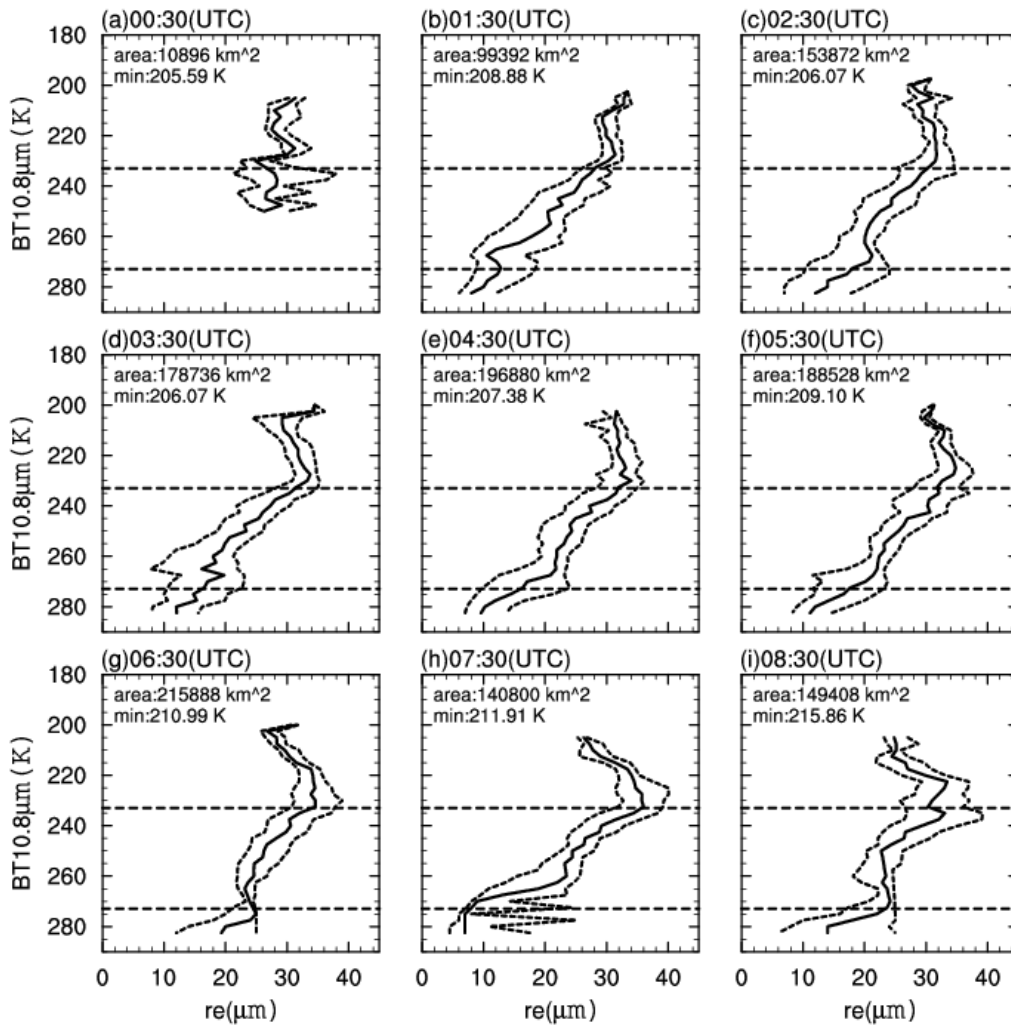

Figure 10: Changes in the  $R_e$  profile (25, 50, and 75 percentiles) in the tracked continuous cloud cluster at one hour intervals. Horizontal dashed lines represent temperatures of 273 K and 233 K, respectively. The text in the figure gives the area of the cloud cluster and the coldest 10% brightness temperature of the cluster.

515
